# Supplementary material
Source: ML conference proceedings conference paper supplement (https://openreview.net/forum?id=yh0OkiUk5h)
Supplement: supplementary_material [file attachment]

---

# FiGURE: Simple and Efficient Unsupervised Node Representations with Filter Augmentations

---

Anonymous Author(s)

Affiliation

Address

email

## Abstract

1 Unsupervised node representations learnt using contrastive learning-based methods  
2 have shown good performance on downstream tasks. However, these methods rely  
3 on augmentations that mimic low-pass filters, limiting their performance on tasks  
4 requiring different eigen-spectrum parts. This paper presents a simple filter-based  
5 augmentation method to capture different parts of the eigen-spectrum. We show  
6 significant improvements using these augmentations. Further, we show that sharing  
7 the same weights across these different filter augmentations is possible, reducing the  
8 computational load. In addition, previous works have shown that good performance  
9 on downstream tasks requires high dimensional representations. Working with high  
10 dimensions increases the computations, especially when multiple augmentations  
11 are involved. We mitigate this problem and recover good performance through  
12 lower dimensional embeddings using simple random Fourier feature projections.  
13 Our method, FiGURE, achieves an average gain of up to 4.4%, compared to the  
14 state-of-the-art unsupervised models, across all datasets in consideration, both  
15 homophilic and heterophilic.

## 16 1 Introduction

17 Contrastive learning is a powerful method for unsupervised graph representation learning, achieving  
18 notable success in various applications [35, 8]. However, these evaluations typically focus on tasks  
19 exhibiting homophily, where task labels strongly correlate with the graph’s structure. An existing  
20 edge suggests the connected nodes likely share similar labels in these scenarios. However, these  
21 representations often struggle when dealing with heterophilic tasks, where edges tend to connect  
22 nodes with different labels.

23 Several papers [4, 10, 3, 20] have tackled the problem of heterophily by leveraging information from  
24 both low and high-frequency components. However, these methods operate in the semi-supervised  
25 setting, and the extension of these ideas in unsupervised learning still needs to be explored. Inspired  
26 by the insights in these papers, we propose a simple method incorporating these principles. Our  
27 approach introduces filter banks as additional views and learns separate representations for each filter  
28 bank. However, this approach faces two main challenges: Firstly, storing representations from each  
29 view can become prohibitively expensive for large graphs; secondly, contrastive learning methods  
30 typically demand high-dimensional representations, which increase both the computational cost of  
31 training and the storage burden.

32 We employ a shared encoder for all filter banks to tackle the first challenge. Our results confirm  
33 that a shared encoder performs on par with independent encoders for each filter bank. This strategy  
34 enables us to reconstruct filter-specific representations as needed, drastically reducing the storage  
35 requirement.

36 For the second challenge, we train our models with low-dimensional embeddings. Then, we use  
 37 random Fourier feature projection [31] to lift these low-dimensional embeddings into a higher-  
 38 dimensional space. Kernel tricks [15] were typically used in classical machine learning to project  
 39 low-dimensional representation to high dimensions where the labels can become linearly separable.  
 40 However, constructing and leveraging the kernels in large dataset scenarios could be expensive. To  
 41 avoid this issue, several papers [31, 32, 13, 28, 18] proposed to approximate the map associated with  
 42 the kernel. For our scenario, we use the map associated with Gaussian kernel [31]. We empirically  
 43 demonstrate that using such a simple approach preserves high performance for downstream tasks,  
 44 even in the contrastive learning setting. Consequently, our solution offers a more efficient approach  
 45 to unsupervised graph representation learning in computation and storage, especially concerning  
 46 heterophilic tasks.

47 Our contributions in this work are, 1] We propose a simple scheme of using filter banks for learning  
 48 representations that can cater to both heterophily and homophily tasks, 2] We address the computa-  
 49 tional and storage burden associated with this simple strategy by sharing the encoder across these  
 50 various filter views, 3] By learning a low-dimensional representation and later projecting it to high  
 51 dimensions using random Fourier Features, we further reduce the burden, 4] We study the perfor-  
 52 mance of our approach on four homophilic and seven heterophilic datasets. Our method achieves  
 53 new SOTA performance in unsupervised representation learning on heterophilic datasets, achieving  
 54 18% gains over prior methods, and in homophilic datasets [22], achieving  $\sim 1.5\%$  gains over prior  
 55 methods. Our method also performs better than supervised methods such as GCN [17] on several  
 56 heterophilic datasets and is competitive on homophilic datasets.

## 57 2 Related Work

58 Several unsupervised representation learning methods have been proposed in prior literature. Random  
 59 walk-based methods like Node2Vec [7] and DeepWalk [29] preserve node proximity but tend to ne-  
 60 glect structural information and node features. Contrastive methods, such as DEEP GRAPH INFOMAX  
 61 (DGI) [35], maximize the mutual information (MI) between local and global representations while  
 62 minimizing the MI between corrupted representations. Methods like MVGRL [8] and GRACE [36]  
 63 expand on this, by integrating additional views into the MI maximization objective.

64 However, most of these methods focus on the low frequency components, overlooking critical insights  
 65 from other parts. Semi-supervised methods like GPRGNN [4], BERNNET [10], and PPGNN [20]  
 66 address this by exploring the entire eigenspectrum, but these concepts are yet to be applied in the  
 67 unsupervised domain.

68 This work proposes the use of a filter bank to capture information across the full eigenspectrum  
 69 while sharing an encoder across filters. Given the high-dimensional representation demand of  
 70 contrastive learning methods, we propose using Random Fourier Features (RFF) to project lower-  
 71 dimensional embeddings into higher-dimensional spaces, reducing computational load without  
 72 sacrificing performance. The ensuing sections define our problem, describe filter banks and random  
 73 feature maps, and explain our model and experimental results.

## 74 3 Problem Setting

75 In the domain of unsupervised representation learning, our focus lies on graph data, denoted as  
 76  $\mathcal{G} = (\mathcal{V}, \mathcal{E})$ , where  $\mathcal{V}$  is the set of vertices and  $\mathcal{E}$  the set of edges ( $\mathcal{E} \subseteq \mathcal{V} \times \mathcal{V}$ ). We associate an  
 77 adjacency matrix with  $\mathcal{G}$ , referred to as  $\mathbf{A} : \mathbf{A} \in \{0, 1\}^{n \times n}$ , where  $n = |\mathcal{V}|$  corresponds to the  
 78 number of nodes. Let  $\mathbf{X} \in \mathbb{R}^{n \times d}$  be the feature matrix. We use  $\mathbf{A}_{\mathbf{I}}$  to represent  $\mathbf{A} + \mathbf{I}$  with  $\mathbf{I}$  is the  
 79 identity matrix, while  $\mathbf{D}_{\mathbf{A}_{\mathbf{I}}}$  signifies the degree matrix of  $\mathbf{A}_{\mathbf{I}}$ . We also define  $\mathbf{A}_{\mathbf{n}}$  as  $\mathbf{D}_{\mathbf{A}_{\mathbf{I}}}^{-1/2} \mathbf{A}_{\mathbf{I}} \mathbf{D}_{\mathbf{A}_{\mathbf{I}}}^{-1/2}$ .  
 80 No additional information is provided during training. The goal is to learn a parameterized encoder,  
 81  $E_{\theta} : \mathbb{R}^{n \times n} \times \mathbb{R}^{n \times d} \mapsto \mathbb{R}^{n \times d'}$ , where  $d' \ll d$ . This encoder produces a set of node representations  
 82  $E_{\theta}(\mathbf{X}, \mathbf{A}_{\mathbf{n}}) = \{h_1, h_2, \dots, h_n\}$  where each  $h_i \in \mathbb{R}^{d'}$  represents a rich representation for node  $i$ . The  
 83 subsequent section will provide preliminary details about filter banks and random feature maps before  
 84 we discuss the specifics of the proposed approach.

## 85 4 Preliminaries

86 Our proposed approach hinges on the critical components of filter banks and random feature maps. In  
87 this section, we delve into brief details about these two facets, setting the stage for a comprehensive  
88 description of our approach.

### 89 4.1 Filter Banks

90 Graph Fourier Transform (GFT) forms the basis of Graph Neural Networks (GNNs). A GFT is defined  
91 using a reference operator  $\mathbf{R}$  which admits a spectral decomposition. Traditionally, in the case of  
92 GNNs, this reference operator has been the symmetric normalized laplacian  $\mathbf{L}_n = \mathbf{I} - \mathbf{A}_n$  or the  $\mathbf{A}_n$   
93 as simplified in [17]. A graph filter is an operator that acts independently on the entire eigenspace of  
94 a diagonalisable and symmetric reference operator  $\mathbf{R}$ , by modulating their corresponding eigenvalues.  
95 [34, 33]. Thus, a graph filter  $\mathbf{H}$  is defined via the graph filter function  $g(\cdot)$  operating on the reference  
96 operator as  $\mathbf{H} = g(\mathbf{R}) = \mathbf{U}g(\mathbf{\Lambda})\mathbf{U}^T$ . Here,  $\mathbf{\Lambda} = \text{diag}([\lambda_1, \lambda_2, \dots, \lambda_n])$ , where  $\lambda_i$  denotes the  
97 eigenvalues of the reference operator.

98 We describe a filter bank as a set of filters, denoted as  $\mathbf{F} = \{\mathbf{F}_1, \mathbf{F}_2, \dots, \mathbf{F}_K\}$ . Both GPRGNN [4]  
99 and BERNNET [10] employ filter banks, comprising polynomial filters, and amalgamate the represen-  
100 tations from each filter bank to enhance the performance across heterophilic datasets. GPRGNN uses  
101 a filter bank defined as  $\mathbf{F}_{\text{GPRGNN}} = \{\mathbf{I}, \mathbf{A}_n, \dots, \mathbf{A}_n^{K-1}\}$ , while  $\mathbf{F}_{\text{BERNNET}} = \{\mathbf{B}_0, \mathbf{B}_1, \dots, \mathbf{B}_{K-1}\}$   
102 characterizes the filter bank utilized by BERNNET. Here,  $\mathbf{B}_i = \frac{1}{2^{K-1}} \binom{K-1}{i} (2\mathbf{I} - \mathbf{L}_n)^{K-i-1} (\mathbf{L}_n)^i$ .

103 Each filter in these banks highlights different parts of the eigenspectrum. By tuning the combination  
104 on downstream tasks, it offers the choice to select and leverage the right spectrum to enhance perfor-  
105 mance. Notably, unlike traditional GNNs, which primarily emphasize low-frequency components,  
106 higher frequency components have proved useful for heterophily [3, 4, 10, 20]. Consequently, a  
107 vital takeaway is that **for comprehensive representations, we must aggregate information from**  
108 **different parts of the eigenspectrum and fine-tune it for specific downstream tasks.**

### 109 4.2 Random Feature Maps for Kernel Approximations

110 Before the emergence of deep learning models, the kernel trick was instrumental in learning non-linear  
111 models. A kernel function,  $k : \mathbb{R}^d \times \mathbb{R}^d \mapsto \mathbb{R}$ , accepts two input features and returns a real-valued  
112 score. Given a positive-definite kernel, Mercer’s Theorem [23] assures the existence of a feature map  
113  $\phi(\cdot)$ , such that  $k(x, y) = \langle \phi(x), \phi(y) \rangle$ . Leveraging the kernel trick, researchers combined Mercer’s  
114 theorem with the representer theorem [15], enabling the construction of non-linear models that remain  
115 linear in  $k$ . These models created directly using  $k$  instead of the potentially complex  $\phi$ , outperformed  
116 traditional linear models. The implicit maps linked with these kernels projected the features into a  
117 significantly high-dimensional space, where targets were presumed to be linearly separable. However,  
118 computational challenges arose when dealing with large datasets.

119 Addressing these issues, subsequent works [32, 13, 28, 31] introduced approximations of the map  
120 associated with individual kernels through random projections into higher-dimensional spaces ( $\phi'(\cdot)$ ).  
121 This approach ensures that  $\langle \phi'(\mathbf{x}), \phi'(\mathbf{y}) \rangle \approx k(x, y)$ . These random feature maps are inexpensive to  
122 compute and affirm that simple projections to higher-dimensional spaces can achieve linear separa-  
123 bility. The critical insight is that **computationally efficient random feature maps exist, capable**  
124 **of projecting lower-dimensional representations into higher dimensions. These projections**  
125 **enhance the adaptability of these representations for downstream tasks. Random Fourier**  
126 **features (RFF) [31] provide a prime example of such techniques.**

## 127 5 Proposed Approach

128 The following section delineates the process of unsupervised representation learning. Post that, we  
129 give details on how the representations learned from each filter bank is used in downstream tasks  
130 using random feature maps.

131 **5.1 Unsupervised Representation Learning**

132 Our method FiGURe (**F**ilter-based **G**raph **U**nsupervised **R**epresentation Learning) builds on concepts  
 133 introduced in [11, 35], extending the maximization of mutual information between node and global  
 134 filter representations for each filter in the filter bank  $\mathbf{F} = \{\mathbf{F}_1, \mathbf{F}_2, \dots, \mathbf{F}_K\}$ . We construct an encoder  
 135 for each filter to maximize the mutual information between the input data and encoder output. For  
 136 the  $i^{\text{th}}$  filter, we learn an encoder,  $E_\theta : \mathcal{X}_i \rightarrow \mathcal{X}'_i$ , denoted by learnable parameters  $\theta$ . In this  
 137 context,  $\mathcal{X}_i$  represents a set of examples, where each example  $[\widehat{\mathbf{X}}_{ij}, \widehat{\mathbf{F}}_{ij}] \in \mathcal{X}_i$  consists of a filter  
 138  $\mathbf{F}_i$ , its corresponding nodes and node features drawn from an empirical probability distribution  $\mathbb{P}_i$ ,  
 139 which captures the joint distribution of features and node representations  $[\mathbf{X}, \mathbf{F}_i]$ .  $\mathcal{X}_i$  defines the  
 140 set of representations learnt by the encoder on utilizing feature information as well as topological  
 141 information from the samples, sampled from the joint distribution  $\mathbb{P}_i$ . The goal, aligned with  
 142 [21, 11, 35], is to identify  $\theta$  that maximizes mutual information between  $[\mathbf{X}, \mathbf{F}_i]$  and  $E_\theta(\mathbf{X}, \mathbf{F}_i)$ ,  
 143 or  $\mathcal{I}_i([\mathbf{X}, \mathbf{F}_i], E_\theta(\mathbf{X}, \mathbf{F}_i))$ . While exact mutual information (MI) computation is unfeasible due to  
 144 unavailable exact data and learned representations distributions, we can estimate the MI using the  
 145 Jensen-Shannon MI estimator [5, 25], defined as:

$$\mathcal{I}_{i,\theta,\omega}^{\text{JSD}}([\mathbf{X}, \mathbf{F}_i], E_\theta(\mathbf{X}, \mathbf{F}_i)) := \mathbb{E}_{\mathbb{P}_i}[-\text{sp}(T_{\theta,\omega}([\widehat{\mathbf{X}}_{ij}, \widehat{\mathbf{F}}_{ij}], E_\theta(\widehat{\mathbf{X}}_{ij}, \widehat{\mathbf{F}}_{ij})))] - \mathbb{E}_{\mathbb{P}_i \times \tilde{\mathbb{P}}_i}[\text{sp}(T_{\theta,\omega}([\widetilde{\mathbf{X}}_{ij}, \widetilde{\mathbf{F}}_{ij}], E_\theta(\widehat{\mathbf{X}}_{ij}, \widehat{\mathbf{F}}_{ij})))] \quad (1)$$

146 Here,  $T_\omega : \mathcal{X}_i \times \mathcal{X}'_i \rightarrow \mathbb{R}$  represents a discriminator function with learnable parameters  $\omega$ . Note that  
 147  $[\widetilde{\mathbf{X}}_{ij}, \widetilde{\mathbf{F}}_{ij}]$  is an input sampled from  $\tilde{\mathbb{P}}_i$ , which is a marginal of the joint distribution of the input data  
 148 and the learned node representations. The function  $\text{sp}(\cdot)$  corresponds to the softplus function [6].  
 149 Additionally,  $T_{\theta,\omega} = D_\omega \circ (\mathcal{R}(E_\theta(\widehat{\mathbf{X}}_{ij}, \widehat{\mathbf{F}}_{ij})), E_\theta(\widehat{\mathbf{X}}_{ij}, \widehat{\mathbf{F}}_{ij}))$ , where  $\mathcal{R}$  denotes the readout function  
 150 responsible for summarizing all node representations by aggregating and distilling information into a  
 151 global filter representation.

152 In our approach, we first obtain node  
 153 representations by feeding the filter-  
 154 specific topology and associated node  
 155 features into the encoder:  $\mathbf{H}_i =$   
 156  $E_\theta(\mathbf{X}_i, \mathbf{F}_i) = \{h_1^{\mathbf{F}_i}, h_2^{\mathbf{F}_i}, \dots, h_n^{\mathbf{F}_i}\}$ .  
 157 To obtain global representations, we  
 158 employ a readout function  $\mathcal{R} :$   
 159  $\mathbb{R}^{N \times d'} \rightarrow \mathbb{R}^{d'}$ , which combines  
 160 and distills information into a global  
 161 representation  $h_g^{\mathbf{F}_i} = \mathcal{R}(\mathbf{H}_i) =$   
 162  $\mathcal{R}(E_\theta(\mathbf{X}, \mathbf{F}_i))$ . Instead of directly  
 163 maximizing the mutual information  
 164 between the local and global repre-  
 165 sentations, we introduce a learnable  
 166 discriminator  $D_\omega : \mathbb{R}^{d'} \times \mathbb{R}^{d'} \rightarrow \mathbb{R}$ ,  
 167 where  $D_\omega(\cdot, \cdot)$  represents the joint  
 168 probability score between the global  
 169 representation and the node-specific  
 170 patch representation. This joint prob-  
 171 ability score should be higher when  
 172 considering global and local repre-  
 173 sentations obtained from the same filter,  
 174 as opposed to the joint probability  
 175 score between the global representa-  
 176 tion from one filter and the local rep-  
 177 resentation from an arbitrary filter.

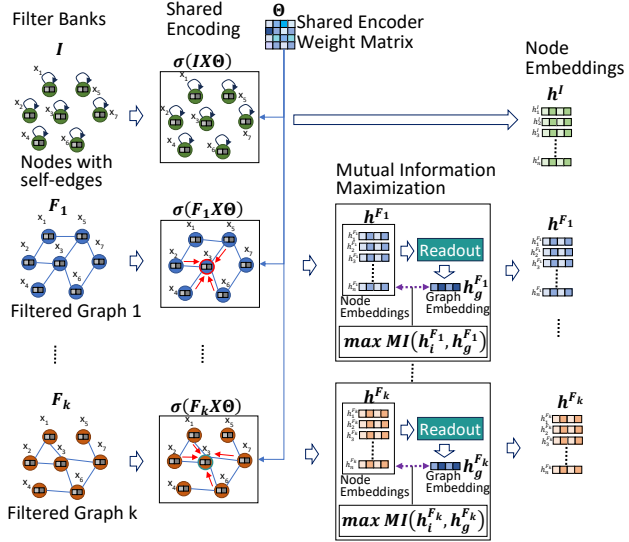

Figure 1: Unsupervised learning of node embeddings by maximizing mutual information between node and graph representations over the graphs from the filter bank. Note that the parameter  $\Theta$  is shared across all the filters.

178 To generate negative samples for contrastive learning, we employ a corruption function  $\mathcal{C} : \mathbb{R}^{N \times d} \times$   
 179  $\mathbb{R}^{N \times N} \rightarrow \mathbb{R}^{M \times d} \times \mathbb{R}^{M \times M}$ , which yields corrupted samples denoted as  $[\widetilde{\mathbf{X}}_{ij}, \widetilde{\mathbf{F}}_{ij}] = \mathcal{C}(\mathbf{X}, \mathbf{F}_i)$ . The  
 180 designed corruption function generates data decorrelated with the input data.

181 In order to learn representations across all filters in the filter bank, we aim to maximise the average  
 182 estimate of mutual information (MI) across all filters, considering  $K$  filters.

$$\mathcal{I}_{\mathbf{F}} = \frac{1}{K} \sum_{i=1}^K \mathcal{I}_{i,\theta,\omega}^{JSD}([\mathbf{X}, \mathbf{F}_i], E_{\theta}(\mathbf{X}, \mathbf{F}_i)) \quad (2)$$

183 Maximising the Jensen-Shannon MI estimator is equivalent to reducing the binary cross entropy loss  
 184 defined between positive samples (sampled from the joint) and the negative samples (sampled from  
 185 the product of marginals). Therefore, for each filter, we minimise the following objective:

$$\mathcal{L}_{\mathbf{F}_i} = \frac{1}{N+M} \left( \sum_{j=1}^N \mathbb{E}_{(\mathbf{X}, \mathbf{F}_i)} [\log(D_{\omega}(h_j^{\mathbf{F}_i}, h_g^{\mathbf{F}_i}))] + \sum_{j=1}^M \mathbb{E}_{(\tilde{\mathbf{X}}, \tilde{\mathbf{F}}_i)} [\log(D_{\omega}(\tilde{h}_j^{\mathbf{F}_i}, h_g^{\mathbf{F}_i}))] \right) \quad (3)$$

186 Therefore to learn meaningful representations across all filters the following objective is minimised:

$$\mathcal{L} = \frac{1}{K} \sum_{i=1}^K \mathcal{L}_{\mathbf{F}_i} \quad (4)$$

187 However, managing the computational cost of training and storage for large graphs with separate node  
 188 representations for each filter presents a significant challenge, exacerbated by the high dimensional  
 189 requirements of contrastive learning methods. We implement parameter sharing to mitigate the first  
 190 issue, borrowing the concept from studies such as [4, 10], thereby sharing the encoder’s parameters  $\theta$   
 191 and the discriminator’s parameters  $\omega$  across all filters. Instead of storing dense filter-specific node  
 192 representations, we only store the parameters of the shared encoder and the first-hop neighbourhood  
 193 information of each node per filter, which has a lower storage cost. For downstream tasks, we  
 194 retrieve the embeddings by reconstructing filter-specific representations. To ensure quick and efficient  
 195 reconstruction, we use a simple one-layer GNN. This on-demand reconstruction of filter-specific  
 196 representations significantly reduces the computational and storage requirements associated with  
 197 individual node representations. Fig 1 illustrates such a simple encoder’s mutual information-based  
 198 learning process.

199 Addressing the second issue, we initially train our models to generate low-dimensional embeddings.  
 200 These encapsulate latent classes, as discussed in [2] as a superset of classes pertinent to downstream  
 201 tasks. Although the low-dimensional embeddings harbour latent class information, they lack linear  
 202 separability. Hence, we project these embeddings into a higher-dimensional space using random  
 203 Fourier feature (RFF) projections, a strategy inspired by kernel methods (Section 4.2). Using this  
 204 approach allows for improved linear separability of the latent classes. Our experimental findings (Sec-  
 205 tion 6.2) affirm the effectiveness of projecting lower-dimensional embeddings into higher dimensions,  
 206 confirming the retention of latent class information in these embeddings.

## 207 5.2 Supervised Representation Learning

208 After obtaining representations for each filter post the reconstruction of the node representations,  
 209 learning an aggregation mechanism to combine information from representations that capture different  
 210 parts of the eigenspectrum for the given task is necessary. We adopt learning schemes proposed in  
 211 [4, 10, 20], where we learn a weighted combination of filter-specific representations. Therefore, the  
 212 combined representations we learn for the downstream task are as follows (considering  $K$  filters from  
 213 the filter bank  $\mathbf{F}$ ):

$$Z = \sum_{i=1}^K \alpha_i \phi'(E_{\theta}(\mathbf{X}, \mathbf{F}_i)) \quad (5)$$

214 The parameters  $\alpha_i$ ’s are learnable. Additionally, the function  $\phi(\cdot)$ ’ represents either the RFF pro-  
 215 jection or an identity transformation, depending on whether  $E_{\theta}(\mathbf{X}, \mathbf{F}_i)$  is low-dimensional or not.  
 216 A classifier model (e.g. logistic regression) consumes these embeddings, where we train both the  
 217  $\alpha_i$ ’s and the weights of the classifier. Fig 2 illustrates this process. The main distinction between  
 218 semi-supervised methods such as [20, 4, 10] and our method is that the semi-supervised methods  
 219 learn both the encoder and the combination coefficients based on labelled data. However, we pre-  
 220 train the encoder in our method and subsequently learn a task-specific combination of filter-specific  
 221 representations.

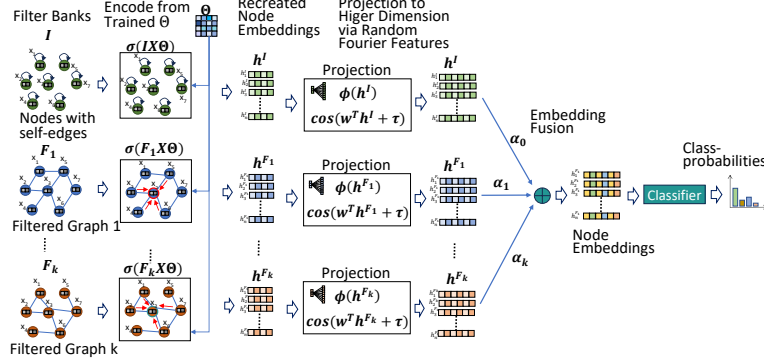

Figure 2: Supervised Learning: Using the trained parameter  $\Theta$ , we generate the node embeddings by encoding the filtered graphs that get consumed in the classification task.

## 222 6 Experimental Results

223 **Training Details:** We define a single-layer graph convolutional network (GCN) with shared weights  
 224 ( $\Theta$ ) across all filters in the filter bank ( $\mathbf{F}$ ) as our encoder. Therefore, the encoder can be expressed  
 225 as follows:  $E_{\theta}(\mathbf{X}, \mathbf{F}_i) = \sigma(\mathbf{F}_i \mathbf{X} \Theta)$ . It is important to note that  $\mathbf{F}_i$  represents a normalized filter  
 226 with self-loops, which ensures that its eigenvalues are within the range of  $[0, 2]$ . The non-linearity  
 227 function  $\sigma$  refers to the parametric rectified linear unit (PReLU) [9]. As we work with a single graph,  
 228 we obtain the positive samples by sampling nodes from the graph. Using these sampled nodes, we  
 229 construct a new adjacency list that only includes the edges between these sampled nodes in filter  
 230  $\mathbf{F}_i$ . On the other hand, the corruption function  $\mathcal{C}$  operates on the same sampled nodes. However,  
 231 it randomly shuffles the node features instead of perturbing the adjacency list. Similar to [35], we  
 232 employ a straightforward readout function that involves averaging the representations across all nodes  
 233 for a specific filter  $\mathbf{F}_i$ :  $\mathcal{R}(\mathbf{H}_i) = \sigma\left(\frac{1}{N} \sum_{j=0}^N h_j^{\mathbf{F}_i}\right)$  where  $\sigma$  denotes the sigmoid non-linearity. We  
 234 utilize a bilinear scoring function, whose parameters are also shared across all filters:

$$D_{\omega}(h_j^{\mathbf{F}_i}, h_g^{\mathbf{F}_i}) = \sigma(h_j^{\mathbf{F}_i T} \mathbf{W} h_g^{\mathbf{F}_i}) \quad (6)$$

235 We learn the encoder and discriminator parameters by optimising Eq. 4. While we could use various  
 236 filter banks, we specifically employ the filter bank corresponding to GPRGNN ( $\mathbf{F}_{\text{GPRGNN}}$ ) for all  
 237 our experiments. However, we also conduct an ablation study (see 6.5) to compare the performance  
 238 when using  $\mathbf{F}_{\text{GPRGNN}}$  versus  $\mathbf{F}_{\text{BERNNET}}$ . For more detailed training information, please refer to the  
 239 supplementary material.

240 We conducted a series of comprehensive experiments to evaluate the effectiveness and competitiveness  
 241 of our proposed model compared to SOTA models and methods. These experiments address the  
 242 following research questions: **[RQ1]** How does FiGURE, perform compared to SOTA unsupervised  
 243 models? **[RQ2]** Can we perform satisfactorily even with lower dimensional representations using  
 244 projections such as RFF? **[RQ3]** Does shared encoder decrease performance? **[RQ4]** What is the  
 245 computational efficiency gained by using lower dimensional representations compared to methods  
 246 that rely on higher dimensional representations? **[RQ5]** Can alternative filter banks be employed to  
 247 recover good quality representations?

248 **Datasets and Setup:** We evaluated our model on a diverse set of real-world datasets, which include  
 249 both heterophilic and homophilic networks, to assess its effectiveness. Similar to previous works, we  
 250 utilized the node classification task as a proxy to evaluate the quality of the learned representations.  
 251 Please refer to the supplementary material for detailed information about the benchmark datasets.

252 The heterophilic datasets used in our evaluation include **CHAMELEON**, **SQUIRREL**, **ROMAN-**  
 253 **EMPIRE**, and **MINESWEEPER**. For **CHAMELEON** and **SQUIRREL**, we adopted the ten random  
 254 splits (with 48%, 32%, and 20% of nodes allocated for the train, validation, and test sets, respectively)  
 255 from [27]. For **ROMAN-EMPIRE** and **MINESWEEPER**, we used the ten random splits provided in  
 256 [30]. Additionally, we evaluated our model on four homophilic datasets: **CORA**, **CITeseer**, and  
 257 **PUBMED**, as borrowed from [14]. We report the mean and standard deviation of the test accuracy  
 258 across different splits. Please refer to the supplementary material for detailed statistics of each dataset.

259 **Baselines:** In our comparison against baselines, we considered common unsupervised approaches,  
 260 such as DEEPWALK and NODE2VEC, and state-of-the-art mutual information-based methods, namely  
 261 DGI, MVGRL, GRACE, and SUGRL. We also include the performance numbers of the widely used  
 262 GCN for reference. It is important to note that unless explicitly mentioned, we set the representation  
 263 size to 512 dimensions for all reported results, consistent with previous work. Please refer to the  
 264 supplementary material for detailed comparisons with other supervised methods and the link to our  
 265 codebase.

## 266 6.1 RQ1: FiGURe versus SOTA Methods

Table 1: Contains node classification accuracy percentages on homophilic and heterophilic datasets. FiGURe<sub>32</sub> and FiGURe<sub>128</sub> refer to FiGURe trained with 32 and 128 dimensional representations, respectively, and then projected using RFF. The remaining models are trained at 512 dimensions. Higher numbers indicate better performance. It is worth noting that FiGURe achieves superior performance or remains competitive with the baseline methods in all cases. The rightmost column Av.  $\Delta_{gain}$  represents the average accuracy % gain of FiGURe over the model in that row, averaged across the different datasets. Blue, Red and Green represent the 1<sup>st</sup>, 2<sup>nd</sup> and 3<sup>rd</sup> best performing models, for a particular dataset.

|                       | HETEROPHILIC DATASETS |                     |                     |                     | HOMOPHILIC DATASETS |                     |                     | Av. $\Delta_{gain}$ |
|-----------------------|-----------------------|---------------------|---------------------|---------------------|---------------------|---------------------|---------------------|---------------------|
|                       | SQUIRREL              | CHAMELEON           | ROMAN-EMPIRE        | MINESWEEPER         | CORA                | CITSEER             | PUBMED              |                     |
| DEEPWALK              | 38.66 (1.44)          | 53.42 (1.73)        | 13.08 (0.59)        | 79.96 (0.08)        | 83.64 (1.85)        | 63.66 (3.36)        | 80.85 (0.44)        | 16.35               |
| NODE2VEC              | 42.60 (1.15)          | 54.23 (2.30)        | 12.12 (0.30)        | 80.00 (0.00)        | 78.19 (1.14)        | 57.45 (6.44)        | 73.24 (0.59)        | 18.56               |
| DGI                   | 39.61 (1.81)          | 59.28 (1.23)        | 47.54 (0.76)        | 82.51 (0.47)        | 84.57 (1.22)        | 73.96 (1.61)        | 86.57 (0.52)        | 7.67                |
| MVGRL                 | 39.90 (1.39)          | 54.61 (2.29)        | <b>68.50 (0.38)</b> | <b>85.60 (0.35)</b> | <b>86.22 (1.30)</b> | <b>75.02 (1.72)</b> | <b>87.12 (0.35)</b> | 4.39                |
| GRACE                 | <b>53.15 (1.10)</b>   | <b>68.25 (1.77)</b> | 47.83 (0.53)        | 80.22 (0.45)        | 84.79 (1.51)        | 67.60 (2.01)        | 87.04 (0.43)        | 5.54                |
| SUGRL                 | 43.13 (1.36)          | 58.60 (2.04)        | 39.40 (0.49)        | 82.40 (0.58)        | 81.21 (2.07)        | 67.50 (1.62)        | 86.90 (0.54)        | 9.80                |
| FiGURe <sub>32</sub>  | 48.89 (1.55)          | 65.66 (2.52)        | 67.67 (0.77)        | 85.28 (0.71)        | 82.56 (0.87)        | 71.25 (2.20)        | 84.18 (0.53)        | 3.18                |
| FiGURe <sub>128</sub> | 48.78 (2.48)          | 66.03 (2.19)        | 68.10 (1.09)        | 85.16 (0.58)        | 86.14 (1.13)        | 73.34 (1.91)        | 85.41 (0.52)        | 2.11                |
| FiGURe                | <b>52.23 (1.19)</b>   | <b>68.55 (1.87)</b> | <b>70.99 (0.52)</b> | <b>85.58 (0.49)</b> | <b>87.00 (1.24)</b> | <b>74.77 (2.00)</b> | <b>88.60 (0.44)</b> | 0.00                |

Table 2: Comparison of Node classification accuracy percentages with the widely used supervised model GCN. Despite not having access to task specific labels, FiGURe learns good quality representations.

|        | SQUIRREL            | CHAMELEON           | ROMAN-EMPIRE        | MINESWEEPER         | CORA                | CITSEER             | PUBMED              |
|--------|---------------------|---------------------|---------------------|---------------------|---------------------|---------------------|---------------------|
| GCN    | 47.78 (2.13)        | 61.43 (2.70)        | <b>73.69 (0.74)</b> | <b>89.75 (0.52)</b> | <b>87.36 (0.91)</b> | <b>76.47 (1.34)</b> | 88.41 (0.46)        |
| FiGURe | <b>52.23 (1.19)</b> | <b>68.55 (1.87)</b> | 70.99 (0.52)        | 85.58 (0.49)        | 87.00 (1.24)        | 74.77 (2.00)        | <b>88.60 (0.44)</b> |

267 We analyzed the results in Table 1 and made important observations. Across homophilic and  
 268 heterophilic datasets, FiGURe consistently outperforms several SOTA unsupervised models, except  
 269 in a few cases where it achieves comparable performance. We want to emphasize the rightmost  
 270 column of the table, which shows the average percentage gain in performance across all datasets.  
 271 This metric compares the improvement that FiGURe provides over each baseline model for each  
 272 dataset and averages these improvements. This metric highlights the performance consistency of  
 273 FiGURe across diverse datasets. No other baseline model achieves the same consistent performance  
 274 across all datasets as FiGURe. Even the recent state-of-the-art contrastive models GRACE and  
 275 SUGRL experience average performance drops of approximately 5% and 10%, respectively. This  
 276 result indicates that FiGURe learns representations that exhibit high generalization and task-agnostic  
 277 capabilities. Another important observation is the effectiveness of RFF projections in improving lower  
 278 dimensional representations. We compared FiGURe at different dimensions, including FiGURe<sub>32</sub>  
 279 and FiGURe<sub>128</sub>, corresponding to learning 32 and 128-dimensional embeddings, respectively, in  
 280 addition to the baseline representation size of 512 dimensions. Remarkably, even at lower dimensions,  
 281 FiGURe with RFF projections demonstrates competitive performance across datasets, surpassing the  
 282 512-dimensional baselines in several cases. This result highlights the effectiveness of RFF projections  
 283 in enhancing the quality of lower dimensional representations. Section 6.2 discusses more insights  
 284 about the effectiveness of RFF projections. Furthermore, we include the widely used supervised  
 285 model, GCN, in Table 2 as a benchmark for comparison. Notably, FiGURe outperforms GCN on  
 286 heterophilic datasets, except for ROMAN-EMPIRE and MINESWEEPER, while achieving competitive  
 287 performance on homophilic datasets. Please refer to supplementary material for detailed comparisons  
 288 with supervised methods.

289 **6.2 RQ2: RFF Projections on Lower Dimensional Representations**

Table 3: Node classification accuracy percentages with and without using Random Fourier Feature projections (on 32 dimensions). A higher number means better performance. The performance is improved by using RFF in almost all cases, indicating the usefulness of this transformation

|        | RFF | CORA                | CITeseer            | SQUIRREL            | CHAMELEON           |
|--------|-----|---------------------|---------------------|---------------------|---------------------|
| DGI    | ×   | <b>81.65 (1.90)</b> | 65.62 (2.39)        | 31.60 (2.19)        | 45.48 (3.02)        |
|        | ✓   | 81.49 (1.96)        | <b>66.50 (2.44)</b> | <b>38.19 (1.52)</b> | <b>56.01 (2.66)</b> |
| MVGRL  | ×   | 78.81 (1.73)        | 70.36 (1.76)        | 29.58 (0.94)        | 46.56 (2.84)        |
|        | ✓   | <b>80.14 (2.41)</b> | <b>70.57 (1.56)</b> | <b>37.83 (1.32)</b> | <b>55.57 (2.28)</b> |
| SUGRL  | ×   | 65.35 (2.41)        | 42.84 (2.57)        | 31.62 (1.47)        | 43.20 (1.79)        |
|        | ✓   | <b>70.06 (1.24)</b> | <b>47.03 (3.02)</b> | <b>38.50 (2.19)</b> | <b>51.01 (2.26)</b> |
| GRACE  | ×   | 76.84 (1.09)        | 58.40 (3.05)        | 38.20 (1.38)        | 53.25 (1.58)        |
|        | ✓   | <b>79.15 (1.44)</b> | <b>63.66 (2.96)</b> | <b>51.56 (1.39)</b> | <b>67.39 (2.23)</b> |
| FiGURE | ×   | <b>82.88 (1.42)</b> | 70.32 (1.98)        | 39.38 (1.35)        | 53.27 (2.40)        |
|        | ✓   | 82.56 (0.87)        | <b>71.25 (2.20)</b> | <b>48.89 (1.55)</b> | <b>65.66 (2.52)</b> |

290 In this section, we analyse the performance of unsupervised baselines using 32-dimensional embed-  
 291 dings with and without RFF projections (see Table 3). Despite extensive hyperparameter tuning,  
 292 we could not replicate the results reported by SUGRL, so we present the best results we obtained.  
 293 Two noteworthy observations emerge from these tables. Firstly, it is evident that lower dimensional  
 294 embeddings can yield meaningful and linearly separable representations when combined with simple  
 295 RFF projections. Utilising RFF projections enhances performance in almost all cases, highlight-  
 296 ing the value captured by MI-based methods even with lower-dimensional embeddings. Secondly,  
 297 FiGURE consistently achieves superior or comparable performance to the baselines, even in lower  
 298 dimensions. Notably, this includes SUGRL, purported to excel in such settings. However, there is a 2-  
 299 3% performance gap between GRACE and our method for the SQUIRREL and CHAMELEON datasets.  
 300 While GRACE handles heterophily well at lower dimensions, its performance deteriorates with  
 301 homophilic graphs, unlike FiGURE which captures lower frequency information effectively. Ad-  
 302 ditionally, our method exhibits computational efficiency advantages for specific datasets in lower  
 303 dimensions. Please refer to the supplementary material for more details. Overall, these findings  
 304 highlight the potential of RFF projections in extracting useful information from lower dimensional  
 305 embeddings and reaffirm the competitiveness of FiGURE over the baselines.

306 **6.3 RQ3: Sharing Weights Across Filter Specific Encoders**

Table 4: A comparison of the performance on the downstream node classification task using indepen-  
 dently trained encoders and weight sharing across encoders is shown. The reported metric is accuracy.  
 In both cases, the embeddings are combined using the method described in 5.2

|             | CORA           | CITeseer       | SQUIRREL       | CHAMELEON      |
|-------------|----------------|----------------|----------------|----------------|
| INDEPENDENT | 86.92 (1.10) % | 75.03 (1.75) % | 50.52 (1.51) % | 66.86 (1.85) % |
| SHARED      | 87.00 (1.24) % | 74.77 (2.00) % | 52.23 (1.19) % | 68.55 (1.87) % |

307 Our method proposes to reduce the computational load by sharing the encoder weights across all  
 308 filters. It stands to reason whether sharing these weights causes any degradation in performance. We  
 309 present the results with shared and independent encoders across the filters in Table 4 to verify this.  
 310 The findings indicate no significant decrease in performance when using shared weights, and in some  
 311 cases, it even leads to improvements, validating the use of shared encoders.

312 **6.4 RQ4: Computational Efficiency**

313 To assess the computational efficiency of the different methods, we analyzed the computation time and  
 314 summarized the results in Table 5. The key metric used in this analysis is the mean epoch time: the  
 315 average time taken to complete one epoch of training. We compared our method with other MI based  
 316 methods such as DGI and MVGRL. Due to the increase in the number of augmentation views,



Table 5: Mean epoch time (in milliseconds) averaged across 20 trials with different hyperparameters. A lower number means the method is faster. Even though our method is slower at 512 dimensions, using 128 and 32 dimensional embeddings significantly reduces the mean epoch time. Using RFF as described in 6.2 we are able to prevent the performance drops experienced by DGI and MVGRL.

|           | DGI          | MVGRL         | FiGURe        | FiGURe <sub>128</sub> | FiGURe <sub>32</sub> |
|-----------|--------------|---------------|---------------|-----------------------|----------------------|
| CORA      | 38.53 (0.77) | 75.29 (0.56)  | 114.38 (0.51) | 20.10 (0.46)          | 11.54 (0.34)         |
| CITeseer  | 52.98 (1.15) | 102.41 (0.99) | 156.24 (0.56) | 30.30 (0.60)          | 17.16 (0.51)         |
| SQUIRREL  | 87.06 (2.07) | 168.24 (2.08) | 257.65 (0.76) | 47.72 (1.40)          | 23.52 (1.14)         |
| CHAMELEON | 33.08 (0.49) | 64.71 (1.05)  | 98.36 (0.64)  | 18.56 (0.39)          | 11.63 (0.48)         |

317 there is an expected increase in computation time from DGI to MVGRL to FiGURe. However,  
 318 as demonstrated in 6.2, using RFF projections allows us to achieve competitive performance even  
 319 at lower dimensions. Therefore, we also included comparisons with our method at 128 and 32  
 320 dimensions in the table. It is evident from the results that our method, both at 128 and 32  
 321 dimensions, exhibits faster computation times compared to both DGI and MVGRL, which rely on higher-  
 322 dimensional representations to achieve good performance. This result indicates that FiGURe is  
 323 computationally efficient due to its ability to work with lower-dimensional representations. During  
 324 training, our method, FiGURe<sub>32</sub>, is  $\sim 3x$  faster than DGI and  $\sim 6x$  times faster than MVGRL.  
 325 Despite the faster computation, FiGURe<sub>32</sub> also exhibits an average performance improvement of  
 326 around 2% across the datasets over all methods considered in our experiments. Please refer to the  
 327 supplementary material for additional comparisons to other unsupervised models.

## 328 6.5 RQ5: Experiments on Other Filter Banks

Table 6: Accuracy percentage results using other filter banks for FiGURe.  $\mathbf{F}_{\text{BERNNET}}^3$  refers to the  $\mathbf{F}_{\text{BERNNET}}$  filter bank (Section 4.1) with  $K$  set to 3 and  $\mathbf{F}_{\text{BERNNET}}^{11}$  refers to  $K$  set to 11.

|                                    | CORA         | CITeseer     | SQUIRREL     | CHAMELEON    |
|------------------------------------|--------------|--------------|--------------|--------------|
| $\mathbf{F}_{\text{BERNNET}}^3$    | 85.13 (1.26) | 73.38 (1.81) | 37.07 (1.29) | 53.95 (2.78) |
| $\mathbf{F}_{\text{BERNNET}}^{11}$ | 86.62 (1.59) | 73.97 (1.43) | 43.48 (3.80) | 62.13 (3.66) |
| $\mathbf{F}_{\text{GPRGNN}}$       | 87.00 (1.24) | 74.77 (2.00) | 52.23 (1.19) | 68.55 (1.87) |

329 To showcase the versatility of our proposed framework, we conducted an experiment using Bernstein  
 330 filters, as detailed in Table 6. The results indicate that using  $\mathbf{F}_{\text{GPRGNN}}$  leads to better performance  
 331 than Bernstein filters. We believe that the reason this is happening is due to the latent characteristics  
 332 of the dataset. [10, 20] have shown that datasets like CHAMELEON and SQUIRREL need frequency  
 333 response functions that give more prominence to the tail-end spectrum.  $\mathbf{F}_{\text{GPRGNN}}$  are more amenable  
 334 to these needs, as demonstrated in [20]. However, datasets requiring frequency response similar to  
 335 comb filters may be better approximated by  $\mathbf{F}_{\text{BERNNET}}$  as their basis gives uniform prominence on  
 336 the entire spectrum. Please refer to the supplementary material, which shows the basis frequency  
 337 responses of these two filter banks, with more clarification. Therefore, although  $\mathbf{F}_{\text{GPRGNN}}$  gives  
 338 better performance for these datasets, there could be datasets where  $\mathbf{F}_{\text{BERNNET}}$  could do better. Hence,  
 339 we proposed a general framework that can work with any filter bank.

## 340 7 Conclusion and Future Work

341 Our work demonstrates the benefits of enhancing contrastive learning methods with filter views and  
 342 learning filter-specific representations to cater to diverse tasks from homophily to heterophily. We  
 343 have effectively alleviated computational and storage burdens by sharing the encoder across these  
 344 filters and focusing on low-dimensional embeddings that utilize high-dimensional projections, a  
 345 technique inspired by random feature maps developed for kernel approximations. Future directions  
 346 include extending the analysis in [2] to graph contrastive learning and explicitly exploring the linear  
 347 separability in low dimensions. This analysis could solidify the connection with the proposed random  
 348 feature maps approach.

## References

- 349
- 350 [1] T. Akiba, S. Sano, T. Yanase, T. Ohta, and M. Koyama. Optuna: A next-generation hyperpa-  
351 rameter optimization framework. In *International conference on knowledge discovery & data*  
352 *mining (KDD)*, pages 2623–2631, 2019.
- 353 [2] S. Arora, H. Khandeparkar, M. Khodak, O. Plevrakis, and N. Saunshi. A theoretical analysis  
354 of contrastive unsupervised representation learning. In *International Conference on Machine*  
355 *Learning (ICML)*, 2019.
- 356 [3] D. Bo, X. Wang, C. Shi, and H.-W. Shen. Beyond low-frequency information in graph con-  
357 volutional networks. In *Association for the Advancement of Artificial Intelligence (AAAI)*,  
358 2021.
- 359 [4] E. Chien, J. Peng, P. Li, and O. Milenkovic. Adaptive universal generalized pagerank graph  
360 neural network. In *International Conference on Learning Representations (ICLR)*, 2021.
- 361 [5] M. D. Donsker and S. R. S. Varadhan. Asymptotic evaluation of certain markov process  
362 expectations for large time. In *Communications on Pure and Applied Mathematics*, 1975.
- 363 [6] C. Dugas, Y. Bengio, F. BÉlisle, C. Nadeau, and R. Garcia. Incorporating second-order functional  
364 knowledge for better option pricing. In *Neural Information Processing Systems (NeurIPS)*,  
365 2000.
- 366 [7] A. Grover and J. Leskovec. node2vec: Scalable feature learning for networks. In *International*  
367 *Conference on Knowledge Discovery and Data Mining (KDD)*, 2016.
- 368 [8] K. Hassani and A. H. Khasahmadi. Contrastive multi-view representation learning on graphs.  
369 In *International Conference on Machine Learning (ICML)*, 2020.
- 370 [9] K. He, X. Zhang, S. Ren, and J. Sun. Delving deep into rectifiers: Surpassing human-level  
371 performance on imagenet classification. In *2015 IEEE International Conference on Computer*  
372 *Vision (ICCV)*, 2015.
- 373 [10] M. He, Z. Wei, Z. Huang, and H. Xu. Bernnet: Learning arbitrary graph spectral filters via  
374 bernstein approximation. In *Neural Information Processing Systems (NeurIPS)*, 2022.
- 375 [11] R. D. Hjelm, A. Fedorov, S. Lavoie-Marchildon, K. Grewal, P. Bachman, A. Trischler, and  
376 Y. Bengio. Learning deep representations by mutual information estimation and maximization.  
377 In *International Conference on Learning Representations (ICLR)*, 2019.
- 378 [12] W. Hu, M. Fey, M. Zitnik, Y. Dong, H. Ren, B. Liu, M. Catasta, and J. Leskovec. Open graph  
379 benchmark: Datasets for machine learning on graphs. In *Neural Information Processing Systems*  
380 *(NeurIPS)*, 2020.
- 381 [13] P. Kar and H. Karnick. Random feature maps for dot product kernels. In *International*  
382 *Conference on Artificial Intelligence and Statistics (AISTATS)*, 2012.
- 383 [14] D. Kim and A. Oh. How to find your friendly neighborhood: Graph attention design with  
384 self-supervision. In *International Conference on Learning Representations (ICLR)*, 2021.
- 385 [15] G. Kimeldorf and G. Wahba. Some results on tchebycheffian spline functions. *Journal of*  
386 *Mathematical Analysis and Applications*, 1971.
- 387 [16] D. P. Kingma and J. Ba. Adam: A method for stochastic optimization. In *International*  
388 *Conference on Learning Representations (ICLR)*, 2015.
- 389 [17] T. N. Kipf and M. Welling. Semi-supervised classification with graph convolutional networks.  
390 In *International Conference on Learning Representations (ICLR)*, 2017.
- 391 [18] Z. Li, J.-F. Ton, D. Oglic, and D. Sejdinovic. Towards a unified analysis of random fourier  
392 features. *Journal of Machine Learning Research (JMLR)*, 2021.
- 393 [19] D. Lim, F. M. Hohne, X. Li, S. L. Huang, V. Gupta, O. P. Bhalerao, and S.-N. Lim. Large scale  
394 learning on non-homophilous graphs: New benchmarks and strong simple methods. In *Neural*  
395 *Information Processing Systems (NeurIPS)*, 2021.

- 396 [20] V. Lingam, C. Ekbote, M. Sharma, R. Ragesh, A. Iyer, and S. Sellamanickam. A piece-wise  
397 polynomial filtering approach for graph neural networks. In *European Conference on Machine  
398 Learning and Principles and Practice of Knowledge Discovery in Databases (ECML PKDD)*,  
399 2022.
- 400 [21] R. Linsker. Self-organization in a perceptual network. *Computer*, 1988.
- 401 [22] M. McPherson, L. Smith-Lovin, and J. M. Cook. Birds of a feather: Homophily in social  
402 networks. *Annual Review of Sociology*, 2001.
- 403 [23] J. Mercer. Functions of positive and negative type, and their connection with the theory  
404 of integral equations. *Philosophical Transactions of the Royal Society of London. Series A,  
405 Containing Papers of a Mathematical or Physical Character*, 1909.
- 406 [24] Y. Mo, L. Peng, J. Xu, X. Shi, and X. Zhu. Simple unsupervised graph representation learning.  
407 In *Association for the Advancement of Artificial Intelligence (AAAI)*, 2022.
- 408 [25] S. Nowozin, B. Cseke, and R. Tomioka. f-gan: Training generative neural samplers using  
409 variational divergence minimization. In *Neural Information Processing Systems (NeurIPS)*,  
410 2016.
- 411 [26] A. Paszke, S. Gross, F. Massa, A. Lerer, J. Bradbury, G. Chanan, T. Killeen, Z. Lin,  
412 N. Gimelshein, L. Antiga, et al. Pytorch: An imperative style, high-performance deep learning  
413 library. In *Neural Information Processing Systems (NeurIPS)*, 2019.
- 414 [27] H. Pei, B. Wei, K. C.-C. Chang, Y. Lei, and B. Yang. Geom-gcn: Geometric graph convolutional  
415 networks. In *International Conference on Learning Representations (ICLR)*, 2020.
- 416 [28] J. Pennington, F. X. X. Yu, and S. Kumar. Spherical random features for polynomial kernels. In  
417 *Neural Information Processing Systems (NeurIPS)*, 2015.
- 418 [29] B. Perozzi, R. Al-Rfou, and S. Skiena. DeepWalk. In *International Conference on Knowledge  
419 Discovery and Data Mining (KDD)*, 2014.
- 420 [30] O. Platonov, D. Kuznedelev, M. Diskin, A. Babenko, and L. Prokhorenkova. A critical look at  
421 the evaluation of GNNs under heterophily: Are we really making progress? In *International  
422 Conference on Learning Representations (ICLR)*, 2023.
- 423 [31] A. Rahimi and B. Recht. Random features for large-scale kernel machines. In *Neural Informa-  
424 tion Processing Systems (NeurIPS)*, 2007.
- 425 [32] A. Rahimi and B. Recht. Weighted sums of random kitchen sinks: Replacing minimization with  
426 randomization in learning. In *Neural Information Processing Systems (NeurIPS)*, 2008.
- 427 [33] D. I. Shuman, S. K. Narang, P. Frossard, A. Ortega, and P. Vandergheynst. The emerging field  
428 of signal processing on graphs: Extending high-dimensional data analysis to networks and other  
429 irregular domains. *IEEE Signal Processing Magazine*, 2013.
- 430 [34] N. Tremblay, P. Gonçalves, and P. Borgnat. Design of graph filters and filterbanks. *Cooperative  
431 and Graph Signal Processing*, 2017.
- 432 [35] P. Veličković, W. Fedus, W. L. Hamilton, P. Liò, Y. Bengio, and R. D. Hjelm. Deep graph  
433 infomax. In *International Conference on Learning Representations (ICLR)*, 2019.
- 434 [36] Y. Zhu, Y. Xu, F. Yu, Q. Liu, S. Wu, and L. Wang. Deep Graph Contrastive Representation  
435 Learning. In *ICML Workshop on Graph Representation Learning and Beyond*, 2020.

## 436 **8 Supplementary Material**

### 437 **Contents**

|     |                                                                               |           |
|-----|-------------------------------------------------------------------------------|-----------|
| 438 | <b>1 Introduction</b>                                                         | <b>1</b>  |
| 439 | <b>2 Related Work</b>                                                         | <b>2</b>  |
| 440 | <b>3 Problem Setting</b>                                                      | <b>2</b>  |
| 441 | <b>4 Preliminaries</b>                                                        | <b>3</b>  |
| 442 | 4.1 Filter Banks . . . . .                                                    | 3         |
| 443 | 4.2 Random Feature Maps for Kernel Approximations . . . . .                   | 3         |
| 444 | <b>5 Proposed Approach</b>                                                    | <b>3</b>  |
| 445 | 5.1 Unsupervised Representation Learning . . . . .                            | 4         |
| 446 | 5.2 Supervised Representation Learning . . . . .                              | 5         |
| 447 | <b>6 Experimental Results</b>                                                 | <b>6</b>  |
| 448 | 6.1 RQ1: FiGURe versus SOTA Methods . . . . .                                 | 7         |
| 449 | 6.2 RQ2: RFF Projections on Lower Dimensional Representations . . . . .       | 8         |
| 450 | 6.3 RQ3: Sharing Weights Across Filter Specific Encoders . . . . .            | 8         |
| 451 | 6.4 RQ4: Computational Efficiency . . . . .                                   | 8         |
| 452 | 6.5 RQ5: Experiments on Other Filter Banks . . . . .                          | 9         |
| 453 | <b>7 Conclusion and Future Work</b>                                           | <b>9</b>  |
| 454 | <b>8 Supplementary Material</b>                                               | <b>12</b> |
| 455 | 8.1 Reproducibility . . . . .                                                 | 12        |
| 456 | 8.2 Datasets . . . . .                                                        | 13        |
| 457 | 8.3 Training Details . . . . .                                                | 13        |
| 458 | 8.3.1 Unsupervised Training . . . . .                                         | 14        |
| 459 | 8.3.2 Supervised Training . . . . .                                           | 14        |
| 460 | 8.3.3 Negative Sampling for the Identity Filter . . . . .                     | 15        |
| 461 | 8.4 Evaluation on large graphs . . . . .                                      | 15        |
| 462 | 8.5 Comparison with other Supervised Methods . . . . .                        | 15        |
| 463 | 8.6 RFF Projections . . . . .                                                 | 16        |
| 464 | 8.7 Computational Comparisons with other Other Unsupervised Methods . . . . . | 16        |
| 465 | 8.8 Choice of Filter Banks . . . . .                                          | 17        |
| 466 | 8.9 Visualising RFF Behavior and Community Structure . . . . .                | 18        |

### 467 **8.1 Reproducibility**

468 We strive to ensure the reproducibility of our research findings. To facilitate this, we provide the  
469 details of our experimental setup, including dataset sources, preprocessing steps, hyperparameters,

470 and model configurations. We also make our code and the datasets used, publicly available at this  
 471 [LINK](#), enabling researchers to reproduce our results and build upon our work. We would like to  
 472 emphasize that our code is built on top of the existing MVGRL codebase. For the datasets used  
 473 in our evaluation, we provide references to their original sources and any specific data splits that  
 474 we employed. This allows others to obtain the same datasets and perform their own analyses using  
 475 consistent data. Additionally, we specify the versions of libraries and frameworks used in our  
 476 experiments, in Section 8.3, and in the REQUIREMENTS file and the README file, in the codebase,  
 477 enabling others to set up a compatible environment. We document any specific seed values or  
 478 randomization procedures that may affect the results. By providing these details and resources,  
 479 we aim to promote transparency and reproducibility in scientific research. We encourage fellow  
 480 researchers to reach out to us if they have any questions or need further clarification on our methods  
 481 or results.

## 482 8.2 Datasets

483 **Homophilic Datasets:** We evaluated our model (as well as baselines) on three homophilic datasets:  
 484 CORA, CITESEER, and PUBMED as borrowed from [14]. All three are citation networks, where  
 485 each node represents a research paper and the links represent citations. Pubmed consists of medical  
 486 research papers. The task is to predict the category of the research paper. We follow the same dataset  
 487 setup mentioned in [14] to create 10 random splits for each of these datasets.

488 **Heterophilic Datasets:** In our evaluation, we included four heterophilic datasets: CHAMELEON,  
 489 SQUIRREL, ROMAN-EMPIRE, and MINESWEEPER. For CHAMELEON and SQUIRREL, nodes represent  
 490 Wikipedia web pages and edges capture mutual links between pages. We utilized the ten random  
 491 splits provided in [27], where 48%, 32%, and 20% of the nodes were allocated for the train, validation,  
 492 and test sets, respectively. In ROMAN-EMPIRE each node corresponds to a word in the Roman Empire  
 493 Wikipedia article. Two words are connected with an edge if either these words follow each other  
 494 in the text, or they are connected in the dependency tree of the sentence. The syntactic role of the  
 495 word/node defines its class label. The MINESWEEPER graph is a regular 100x100 grid where each  
 496 node is connected to eight neighboring nodes, and the features are on-hot encoded representations  
 497 of the number of neighboring mines. The task is to predict which nodes are mines. For both  
 498 ROMAN-EMPIRE and MINESWEEPER, we used the ten random splits provided in [30].

499 **Large Datasets:** We also evaluate our method on two large datasets OGBN-ARXIV (from [12])  
 500 and ARXIV-YEAR (from [19]). Both these datasets are from the arxiv citation network. In OGBN-  
 501 ARXIV, the task is to predict the category of the research paper, and in ARXIV-YEAR the task is  
 502 to predict the year of publishing. We use the publicly available splits for OGBN-ARXIV [14] and  
 503 follow the same dataset setup mentioned in [19] to generate 5 random splits for ARXIV-YEAR. Note  
 504 that OGBN-ARXIV is a homophilic dataset while ARXIV-YEAR is a heterophilic datasets.

505 The detailed dataset statistics can be found in Table 7.

Table 7: Dataset Statistics. The table provides information on the following dataset characteristics: number of nodes, number of edges, feature dimension, number of classes, as well as the count of nodes used for training, validation, and testing.

| PROPERTIES | HETEROFILIC DATASETS |           |              |             |            | HOMOPHILIC DATASETS |         |        |       |
|------------|----------------------|-----------|--------------|-------------|------------|---------------------|---------|--------|-------|
|            | SQUIRREL             | CHAMELEON | ROMAN-EMPIRE | MINESWEEPER | ARXIV-YEAR | OGBN-ARXIV          | CITSEER | PUBMED | CORA  |
| #NODES     | 5201                 | 2277      | 22662        | 10000       | 169343     | 169343              | 3327    | 19717  | 2708  |
| #EDGES     | 222134               | 38328     | 32927        | 39402       | 1166243    | 1335586             | 12431   | 108365 | 13264 |
| #FEATURES  | 2089                 | 500       | 300          | 7           | 128        | 128                 | 3703    | 500    | 1433  |
| #CLASSES   | 5                    | 5         | 18           | 2           | 5          | 40                  | 6       | 3      | 7     |
| #TRAIN     | 2496                 | 1092      | 11331        | 5000        | 84671      | 90941               | 1596    | 9463   | 1192  |
| #VAL       | 1664                 | 729       | 5665         | 2500        | 42335      | 29799               | 1065    | 6310   | 796   |
| #TEST      | 1041                 | 456       | 5666         | 2500        | 42337      | 48603               | 666     | 3944   | 497   |

## 506 8.3 Training Details

507 We conducted all experiments on a machine equipped with an Intel(R) Xeon(R) CPU E5-2690 v4 @  
 508 2.60GHz processor, 440GB RAM, and a Tesla-P100 GPU with 16GB of memory. The experiments  
 509 were executed using Python 3.9.12 and PyTorch 1.13.0 [26]. To optimize the hyperparameter search,  
 510 we employed Optuna [1]. We utilized the Adam optimizer [16] for the optimization process.

### 511 8.3.1 Unsupervised Training

512 We conducted hyperparameter tuning for all unsupervised methods using 20 Optuna trials. The  
513 hyperparameter ranges and settings for each method are as follows:

514 DEEPWALK: We set the learning rate to 0.01, number of epochs to 20 and the varied the random  
515 walk length over  $\{8, 9, 10, 11, 12\}$ . Additionally, we varied the context window size over  $\{3, 4, 5\}$   
516 and the negative size (number of negative samples per positive sample) over  $\{4, 5, 6\}$ .

517 NODE2VEC: For Node2Vec, we set the learning rate to 0.01 and number of epochs to 100. We varied  
518 the number of walks over  $\{5, 10, 15\}$  and the walk length over  $\{40, 50, 60\}$ . The  $p$  (return parameter)  
519 value was chosen from  $\{0.1, 0.25, 0.5, 1\}$  and  $q$  (in-out parameter) value was chosen from  $\{3, 4, 5\}$ .

520 DGI: DGI [35] proposes a self-supervised learning framework for graph representation learning by  
521 maximizing the mutual information between local and global structural context of nodes, enabling  
522 unsupervised feature extraction in graph neural networks. We relied on the authors' code<sup>1</sup> and the  
523 prescribed hyperparameter ranges specific to the DGI model, for our experiments.

524 MVGRL: MVGRL [8] proposes a method for learning unsupervised node representations by  
525 leveraging two views of the graph data, the graph diffusion view and adjacency graph view. We relied  
526 on the authors' code<sup>2</sup> and the prescribed hyperparameter ranges specific to the MVGRL model, for  
527 our experiments.

528 GRACE: GRACE [36] proposes a technique where two different perspectives of the graph are  
529 created through corruption, and the learning process involves maximizing the consistency between  
530 the node representations obtained from these two views. We relied on the authors' code<sup>3</sup> and the  
531 prescribed hyperparameter ranges specific to the GRACE model, for our experiments.

532 SUGRL: SUGRL [24] proposes a technique for learning unsupervised representations which capture  
533 node proximity, while also utilising node feature information. We relied on the authors' code<sup>4</sup> and  
534 the prescribed hyperparameter ranges specific to the SUGRL model, for our experiments.

535 FiGURE: We followed the setting of the MVGRL model, setting the batch size to 2 and number of  
536 GCN layers to 1. We further tuned the learning rate over  $\{0.00001, 0.0001, 0.001, 0.01, 0.1\}$  and the  
537 sample size (number of nodes selected per batch) over  $\{1500, 1750, 2000, 2250\}$ .

538 In each case, we selected the hyperparameters that resulted in the lowest unsupervised training loss.

### 539 8.3.2 Supervised Training

540 For all unsupervised methods, including the baselines and our method, we perform post-training  
541 supervised evaluation using logistic regression with 60 Optuna trials. We set the maximum number  
542 of epochs to 10000 and select the epoch and hyperparameters that yield the best validation accuracy.  
543 The learning rate is swept over the range  $\{0.00001, 0.0001, 0.001, 0.0015, 0.01, 0.015, 0.1, 0.5, 1, 2\}$ ,  
544 and the weight decay is varied over  $\{10^{-5}, 10^{-4}, 10^{-3}, 10^{-2}, 10^{-1}, 0, 0.5, 1, 3\}$ .

545 FiGURE: Along with the hyperparameters described above, following the approach described in [10],  
546 we also tune the combination coefficients ( $\alpha_i$ 's) with a separate learning rate. This separate learning  
547 rate is swept over the range  $\{0.00001, 0.0001, 0.001, 0.0015, 0.01, 0.015, 0.1, 0.5, 1, 2\}$ . In addition,  
548 we have a coefficient for masking the incoming embeddings from each filter, which is varied between  
549 0 and 1. Furthermore, these coefficients are passed through an activation layer, and we have two  
550 options: 'none' and 'exp'. When 'none' is selected, the coefficients are used directly, while 'exp'  
551 indicates that they are passed through an exponential function before being used.

552 FiGURE with RFF: For the experiments involving Random Fourier Features (RFF), we use  
553 the same hyperparameter ranges as mentioned above. However, we also tune the gamma pa-  
554 rameter which is specific to RFF projections. The gamma parameter is tuned within the range  
555  $\{0.1, 0.2, 0.3, 0.4, 0.5, 0.6, 0.7, 0.8, 0.9, 1.0, 1.1, 1.2\}$ .

---

<sup>1</sup><https://github.com/PetarV-/DGI.git>

<sup>2</sup><https://github.com/kavehhassani/mvgrl.git>

<sup>3</sup><https://github.com/CRIPAC-DIG/GRACE.git>

<sup>4</sup><https://github.com/YujieMo/SUGRL.git>

### 556 8.3.3 Negative Sampling for the Identity Filter

557 In our implementation of  $\mathbf{F}_{\text{GPRGNN}}$  or  $\mathbf{F}_{\text{BERNNET}}$ , we follow a specific procedure for handling the  
 558 filters during training and evaluation. For all filters except the identity filter ( $\mathbf{I}$ ), we employ the  
 559 negative sampling approach described in Section 6. However, the identity filter is treated differently.  
 560 During training, we exclude the identity filter and only include it during evaluation.

561 During negative sampling, the generation of the negative anchor involves shuffling the node features,  
 562 followed by premultiplying the shuffled node feature matrix with the filter matrix and computing the  
 563 mean. On the other hand, for the positive anchor, the same procedure is applied without shuffling the  
 564 node features. This approach encourages the model to learn meaningful patterns and relationships in  
 565 the data when the filter matrix is not the identity matrix.

566 The decision to exclude the identity filter during training is based on the observation that it presents a  
 567 special case where the positive and negative anchors become the same. As a result, the model would  
 568 optimize and minimize the same quantity, potentially leading to trivial solutions. To prevent this, we  
 569 exclude the identity filter during training.

570 By excluding the identity filter during training, we ensure that the model focuses on the other filters in  
 571  $\mathbf{F}_{\text{GPRGNN}}$  or  $\mathbf{F}_{\text{BERNNET}}$  to capture and leverage the diverse information present in the graph. Including  
 572 the identity filter only during evaluation allows us to evaluate its contribution to the final performance  
 573 of the model. This approach helps prevent the model from learning trivial solutions and ensures that  
 574 it learns meaningful representations by leveraging the other filters.

## 575 8.4 Evaluation on large graphs

Table 8: Contains node classification accuracy percentages on two large-scale datasets OGBN-ARXIV and ARXIV-YEAR have been added. FiGURE<sub>32</sub> and FiGURE<sub>128</sub> refer to FiGURE trained with 32 and 128 dimensional representations, respectively, and then projected using RFF. The remaining models are trained at 512 dimensions. Higher numbers indicate better performance. Blue, Red and Green represent the 1<sup>st</sup>, 2<sup>nd</sup> and 3<sup>rd</sup> best performing models, for a particular dataset.

|                       | HETEROPHILIC DATASETS |              |              |              |              | HOMOPHILIC DATASETS |              |              |              | Av. $\Delta_{\text{gain}}$ |
|-----------------------|-----------------------|--------------|--------------|--------------|--------------|---------------------|--------------|--------------|--------------|----------------------------|
|                       | SQUIRREL              | CHAMELEON    | ROMAN-EMPIRE | MINESWEEPER  | ARXIV-YEAR   | CORA                | CITSEER      | PUBMED       | OGBN-ARXIV   |                            |
| DGI                   | 39.61 (1.81)          | 59.28 (1.23) | 47.54 (0.76) | 82.51 (0.47) | 40.59 (0.09) | 84.57 (1.22)        | 73.96 (1.61) | 86.57 (0.52) | 65.58 (0.00) | 6.61                       |
| MVGRL                 | 39.90 (1.39)          | 54.61 (2.29) | 68.50 (0.38) | 85.60 (0.35) | OOM          | 86.22 (1.30)        | 75.02 (1.72) | 87.12 (0.35) | OOM          | 4.39                       |
| GRACE                 | 53.15 (1.10)          | 68.25 (1.77) | 47.83 (0.53) | 80.22 (0.45) | OOM          | 84.79 (1.51)        | 67.60 (2.01) | 87.04 (0.43) | OOM          | 5.54                       |
| SUGRL                 | 43.13 (1.36)          | 58.60 (2.04) | 39.40 (0.49) | 82.40 (0.58) | 36.96 (0.19) | 81.21 (2.07)        | 67.50 (1.62) | 86.90 (0.54) | 65.80 (0.00) | 8.64                       |
| FiGURE <sub>32</sub>  | 48.89 (1.55)          | 65.66 (2.52) | 67.67 (0.77) | 85.28 (0.71) | 41.30 (0.21) | 82.56 (0.87)        | 71.25 (2.20) | 84.18 (0.53) | 66.58 (0.00) | 3.18                       |
| FiGURE <sub>128</sub> | 48.78 (2.48)          | 66.03 (2.19) | 68.10 (1.09) | 85.16 (0.58) | 41.94 (0.15) | 86.14 (1.13)        | 73.34 (1.91) | 85.41 (0.52) | 69.11 (0.00) | 2.11                       |
| FiGURE                | 52.23 (1.19)          | 68.55 (1.87) | 70.99 (0.52) | 85.58 (0.49) | 42.26 (0.20) | 87.00 (1.24)        | 74.77 (2.00) | 88.60 (0.44) | 69.69 (0.00) | 0.00                       |

576 Similar to Table 1, Table 8, provides a comparison with SOTA methods such as DGI, MVGRL,  
 577 GRACE and SUGRL. However, in this table we also incorporate the large-scale datasets ARXIV-  
 578 YEAR and OGBN-ARXIV. FiGURE shows good performance on these datasets as well, demonstrat-  
 579 ing the scalability of our method. The last column, average percentage gain, is updated accordingly.  
 580 Two baseline methods MVGRL and GRACE run into memory issues on the larger datasets and  
 581 are accordingly reported OOM in the table. Even the lower-dimensional representations (with RFF  
 582 projections) are able to beat the baselines on these large scale datasets. Overall, FiGURE is consis-  
 583 tently able to provide gains over the baselines methods regardless of the kind of graph, homophilic,  
 584 heterophilic or large-scale. This once again demonstrates the generalizability of FiGURE. It is  
 585 noteworthy that computational efficiency gained by reducing the dimension size becomes significant  
 586 with the scale of the dataset. On ARXIV-YEAR for example, 128 dimensional embeddings give 1.6x  
 587 speedup and 32 dimensional embeddings give 1.7x speedup.

## 588 8.5 Comparison with other Supervised Methods

589 Table 9 presents a comparison with common supervised baselines. Specifically, we choose 3 models  
 590 for comparison, representing three different kinds of supervised methods, standard aggregation  
 591 models (GCN), spectral filter-based models (GPRGNN) and smart-aggregation models (H<sub>2</sub>GCN).  
 592 There are two key observations from this table. Firstly, FiGURE is competitive with the supervised  
 593 baselines, lagging behind only by a few percentage points in some cases. This suggests that much of  
 594 the information that is required by the downstream tasks, captured by the supervised models, can be  
 595 made available through unsupervised methods like FiGURE which uses filter banks. It is important

596 to note that in FiGURe we only utilize logistic regression while evaluating on the downstream task.  
 597 This is much more efficient than training a graph neural network end to end. Additionally it is possible  
 598 that further gains may be obtained by utilizing a non-linear model like an MLP.

599 Furthermore, as indicated by 9, we can gain further computational efficiency by utilizing lower  
 600 dimensional representations like 32 and 128 (with RFF), and still not compromise significantly on  
 601 the performance.

602 Overall FiGURe manages to remain competitive despite not having access to task-specific labels and  
 603 is computationally efficient as well.

Table 9: Contains node classification accuracy percentages on heterophilic and homophilic datasets. GCN, GPRGNN and H<sub>2</sub>GCN are supervised methods. FiGURe<sub>32</sub> and FiGURe<sub>128</sub> refer to FiGURe trained with 32 and 128 dimensional representations, respectively, and then projected using RFF. The remaining models are trained at 512 dimensions. Higher numbers indicate better performance.

|                       | HETEROPHILIC DATASETS |              |              |              |              | HOMOPHILIC DATASETS |              |              |              |
|-----------------------|-----------------------|--------------|--------------|--------------|--------------|---------------------|--------------|--------------|--------------|
|                       | SQUIRREL              | CHAMELEON    | ROMAN-EMPIRE | MINESWEEPER  | ARXIV-YEAR   | OGBN-ARXIV          | CORA         | CITeseer     | PUBMED       |
| GCN                   | 47.78 (2.13)          | 62.83 (1.52) | 73.69 (0.74) | 89.75 (0.52) | 46.02 (0.26) | 69.37 (0.00)        | 87.36 (0.91) | 76.47 (1.34) | 88.41 (0.46) |
| GPRGNN                | 46.31 (2.46)          | 62.59 (2.04) | 64.85 (0.27) | 86.24 (0.61) | 45.07 (0.21) | 68.44 (0.00)        | 87.77 (1.31) | 76.84 (1.69) | 89.08 (0.39) |
| H <sub>2</sub> GCN    | 37.90 (2.02)          | 58.40 (2.77) | 60.11 (0.52) | 89.71 (0.31) | 49.09 (0.10) | OOM                 | 87.81 (1.35) | 77.07 (1.64) | 89.59 (0.33) |
| FiGURe <sub>32</sub>  | 48.89 (1.55)          | 65.66 (2.52) | 67.67 (0.77) | 85.28 (0.71) | 41.30 (0.21) | 66.58 (0.00)        | 82.56 (0.87) | 71.25 (2.20) | 84.18 (0.53) |
| FiGURe <sub>128</sub> | 48.78 (2.48)          | 66.03 (2.19) | 68.10 (1.09) | 85.16 (0.58) | 41.94 (0.15) | 69.11 (0.00)        | 86.14 (1.13) | 73.34 (1.91) | 85.41 (0.52) |
| FiGURe                | 52.23 (1.19)          | 68.55 (1.87) | 70.99(0.52)  | 85.58 (0.49) | 42.26 (0.20) | 69.69 (0.00)        | 87.00 (1.24) | 74.77 (2.00) | 88.60 (0.44) |

## 604 8.6 RFF Projections

605 As shown in Section 6.2 and in Section 6.4, RFF projections are a computationally efficient way to  
 606 achieve training by preserving the latent class behavior present in lower dimensional embeddings,  
 607 by projecting them into a higher dimensional linearly separable space. The natural question that  
 608 comes up is how do we compute these RFF projections? We provide an algorithm to compute the  
 609 RFF projections in this section, in algorithm 1. Note that this follows [31].

---

### Algorithm 1 Random Fourier Feature Computation

---

**Require:** Input data  $X \in \mathbb{R}^{N \times d}$ , target dimension  $D$ , kernel bandwidth  $\gamma$

**Ensure:** Random Fourier Features  $Z \in \mathbb{R}^{N \times D}$

- 1: Initialize random weight matrix  $W \in \mathbb{R}^{d \times D}$  with Gaussian distribution
  - 2: Initialize random bias vector  $b \in \mathbb{R}^D$  uniformly from  $[0, 2\pi]$
  - 3: Compute scaled input  $X' = \gamma XW + b$
  - 4: Compute random Fourier features  $Z = \sqrt{\frac{2}{D}} \cos(X')$
  - 5: **return**  $Z$
- 

## 610 8.7 Computational Comparisons with other Other Unsupervised Methods

Table 10: Mean epoch time (in milliseconds) averaged across 20 trials with different hyperparameters. A lower number means the method is faster. Even though our method is slower at 512 dimensions, using 128 and 32 dimensional embeddings significantly reduces the mean epoch time. Using RFF as described in 6.2 we are able to prevent the performance drops experienced by SUGRL and GRACE.

|           | SUGRL        | GRACE         | FiGURe        | FiGURe <sub>128</sub> | FiGURe <sub>32</sub> |
|-----------|--------------|---------------|---------------|-----------------------|----------------------|
| CORA      | 15.92 (4.10) | 51.19 (6.8)   | 114.38 (0.51) | 20.10 (0.46)          | 11.54 (0.34)         |
| CITeseer  | 24.37 (4.92) | 77.16 (7.2)   | 156.24 (0.56) | 30.30 (0.60)          | 17.16 (0.51)         |
| SQUIRREL  | 33.63 (6.94) | 355.2 (67.34) | 257.65 (0.76) | 47.72 (1.40)          | 23.52 (1.14)         |
| CHAMELEON | 16.91 (5.90) | 85.05 (14.1)  | 98.36 (0.64)  | 18.56 (0.39)          | 11.63 (0.48)         |

611 In Section 6.4, we compared the computational time of FiGURe with MVGRL and DGI, as all  
 612 three methods fall under the category of unsupervised methods that perform contrastive learning  
 613 with representations of the entire graph. However, there is another class of methods, such as



614 SUGRL and GRACE, that contrast against other nodes without the need for graph representation  
615 computation. Consequently, these methods exhibit higher computational efficiency. Hence, as show  
616 in Table 10 upon initial inspection, it appears that SUGRL (at 512 dimensions) exhibits the highest  
617 computational efficiency, even outperforming  $\text{FiGUR}_{e_{128}}$ . However, despite its computational  
618 efficiency, the significant drop in performance across datasets (as discussed in Section 6.1) renders  
619 it less favorable for consideration. In fact,  $\text{FiGUR}_{e_{32}}$  offers computational cost savings compared  
620 to SUGRL, while also achieving significantly better downstream classification accuracy. Turning  
621 to GRACE, it demonstrates greater computational efficiency than  $\text{FiGUR}_{e_{512}}$  (at 512 dimensions) for  
622 low to medium-sized graphs. However, as the graph size increases, due to random node feature  
623 level masking and edge level masking, the computational requirements of GRACE substantially  
624 increase (as evidenced by the results on SQUIRREL). Therefore, for larger graphs with more than  
625 approximately 5000 nodes,  $\text{FiGUR}_{e_{512}}$  proves to be more computationally efficient than GRACE (even  
626 at 512 dimensions). Furthermore, considering the performance improvements exhibited by  $\text{FiGUR}_{e_{512}}$ ,  
627 it is evident that  $\text{FiGUR}_{e_{512}}$  (combined with RFF projections) emerges as the preferred method for  
628 unsupervised contrastive learning in graph data.

## 629 8.8 Choice of Filter Banks

630 In Section 4.1, we explore the flexibility of  $\text{FiGUR}_{e_{512}}$  to accommodate various filter banks. When  
631 making a choice, it is crucial to examine the intrinsic properties of the filters contained within different  
632 filter banks. We pick two filter banks  $\mathbf{F}_{\text{BERNNET}}$  and  $\mathbf{F}_{\text{GPRGNN}}$  and provide an overview of the filters  
633 contained in the filter banks. We use these two filter banks as examples to illustrate what should one  
634 be looking for, while choosing a filter bank.

635 **Bernstein Polynomials:** Figure 3 illustrates that as the number of Bernstein Basis increases, the  
636 focus on different parts of the eigenspectrum also undergoes changes. With an increase in polynomial  
637 order, two notable effects can be observed. Firstly, the number of filters increases, enabling each  
638 filter to focus on more fine-grained eigenvalues. This expanded set of polynomial filters allows for a  
639 more detailed examination of the eigenspectrum. Secondly, if we examine the first and last Bernstein  
640 polynomials, we observe an outward shift in their shape. This shift results in the enhancement of a  
641 specific fine-grained part at the ends of the spectrum. These observations demonstrate that Bernstein  
642 polynomials offer the capability to selectively target and enhance specific regions of interest within  
643 the eigenspectrum

644 **Standard Basis:** Figure 3 reveals two key observations. Firstly, at a polynomial order of 2, the  
645 standard basis exhibit focus at the ends of the spectrum, in contrast to the behavior of Bernstein  
646 polynomials, which tend to concentrate more on the middle of the eigenspectrum. This discrepancy  
647 highlights the distinct characteristics and emphasis of different polynomial bases in capturing different  
648 parts of the eigenspectrum. Secondly, as the number of polynomials increases (in contrast to  
649 Bernstein polynomials), the lower order polynomials remain relatively unchanged. Instead, additional  
650 polynomials are introduced, offering a more fine-grained focus at the ends of the spectrum. This  
651 expansion of polynomials allows for a more detailed exploration of specific regions of interest within  
652 the the ends of eigenspectrum.

653 In the context of filter banks, previous studies [20, 4] have demonstrated that certain datasets, such as  
654 SQUIRREL and CHAMELEON, benefit from frequency response functions that enhance the tail ends  
655 of the eigenspectrum. This observation suggests that the standard basis, which naturally focuses  
656 on the ends of the spectrum, may outperform Bernstein basis functions at lower orders. However,  
657 as the order of the Bernstein basis increases, as discussed in 4.1, there is a notable improvement in  
658 performance. This can be attributed to the increased focus of Bernstein basis functions on specific  
659 regions, particularly the ends of the spectrum. As a result, higher-order Bernstein filters exhibit  
660 enhanced capability in capturing important information in those regions. It is worth noting that the  
661 choice between  $\mathbf{F}_{\text{GPRGNN}}$  and  $\mathbf{F}_{\text{BERNNET}}$  depends on the specific requirements of the downstream  
662 task. If the task necessitates a stronger focus on the middle of the spectrum or requires a band-pass or  
663 comb-like frequency response,  $\mathbf{F}_{\text{BERNNET}}$  is likely to outperform  $\mathbf{F}_{\text{GPRGNN}}$ . Thus, the selection of the  
664 appropriate filter bank should be based on the desired emphasis on different parts of the eigenspectrum.  
665 Regarding the performance comparison between  $\mathbf{F}_{\text{BERNNET}}$  and  $\mathbf{F}_{\text{GPRGNN}}$ , it is plausible that as we  
666 increase the order of the Bernstein basis, the performance could potentially match that of  $\mathbf{F}_{\text{GPRGNN}}$ .  
667 However, further investigation and experimentation are required to determine the specific conditions  
668 and orders at which this convergence in performance occurs.

## 669 8.9 Visualising RFF Behavior and Community Structure

670 As shown in prior sections, FiGURe improves on both computational efficiency as well as perfor-  
671 mance by utilising RFF projections. In this section, we aim to gain insights into the behavior of  
672 RFF projections and comprehend their underlying operations through a series of simple visualizations.

673 **t-SNE Plots:** Figure 4 offers insights into the structure of the embeddings for the CORA dataset  
674 across different dimensions. Remarkably, even at lower dimensions (e.g., 32 dimensions), clear  
675 class structures are discernible, indicating that the embeddings capture meaningful information  
676 related to the class labels. Furthermore, when employing RFF to project the embeddings into higher  
677 dimensions, these distinct class structures are still preserved. This suggests that the role of RFF is not  
678 to introduce new information, but rather to enhance the suitability of lower-dimensional embeddings  
679 for linear classifiers while maintaining the underlying class-related information. Notably, even at  
680 512 dimensions, the class structures remain distinguishable. However, it is worth noting that the  
681 class-specific embeddings appear to be more tightly clustered and less dispersed compared to the  
682 32-dimensional embeddings or the projected 32-dimensional embeddings. This suggests that learning  
683 a 512-dimensional embedding differs inherently from learning a 32-dimensional embedding and  
684 subsequently projecting it into higher dimensions.

685 **Correlation Plots:** Figure 5 offers insights into the correlation patterns within the embeddings gener-  
686 ated from the SQUIRREL dataset across different dimensions. In lower dimensions, the embeddings  
687 exhibit high correlation with each other, which can be attributed to the presence of a mixture of  
688 topics or latent classes within the dataset. However, when the embeddings are projected to higher  
689 dimensions using RFF, the correlation is reduced, and a block diagonal matrix emerges. This block  
690 diagonal structure indicates the presence of distinct classes or communities within the dataset. Even at  
691 512 dimensions, a more refined block diagonal structure can be observed compared to the correlation  
692 matrix of the 32-dimensional embeddings. Furthermore, it is noteworthy that the correlation of  
693 the projected embeddings can be regarded as a sparser version of the correlation observed in the  
694 512-dimensional embeddings.

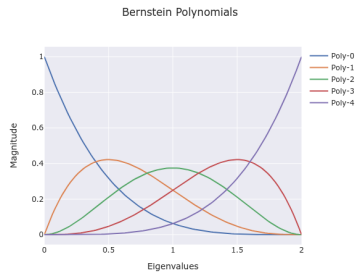

(a) Five Bernstein Basis

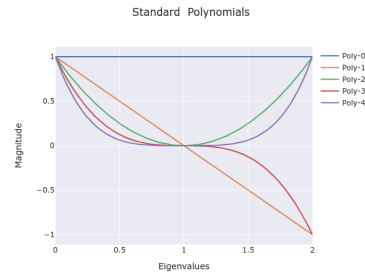

(b) Five Standard Basis

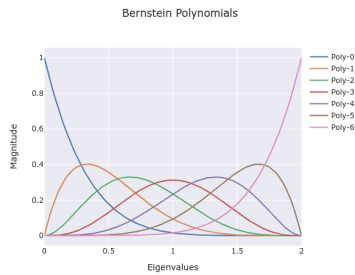

(c) Seven Bernstein Basis

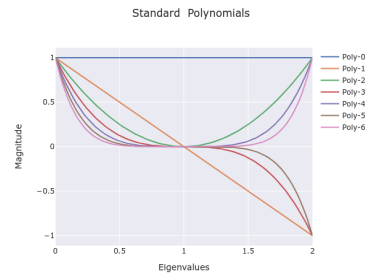

(d) Seven Standard Basis

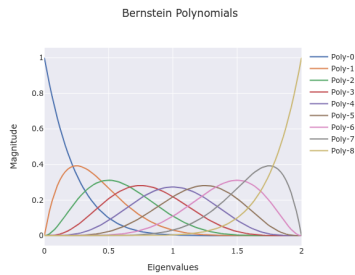

(e) Nine Bernstein Basis

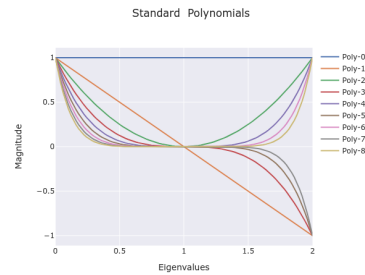

(f) Nine Standard Basis

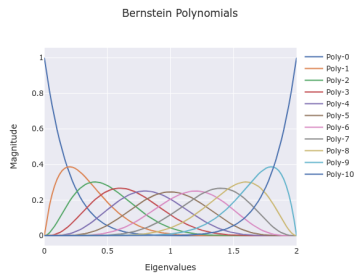

(g) Eleven Bernstein Basis

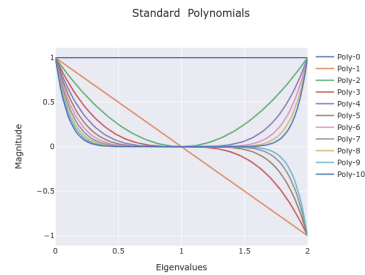

(h) Eleven Standard Basis

Figure 3: The figures contain the Bernstein basis as well as standard basis for different degrees. The x-axis of the figures represents the eigenvalues of the Laplacian matrix, while the y-axis represents the magnitude of the polynomials. It is important to note that while plotting the standard polynomials, they are computed with respect to the Laplacian matrix ( $L_n$ ) rather than the adjacency matrix. As a result, the eigenvalues lie between  $[0, 2]$ . On the other hand, the Bernstein polynomials are typically defined for the normalised Laplacian matrix, and therefore there is no change in the eigenvalue range (the eigenvalues of the normalised Laplacian matrix typically range from 0 to 2). By using the Laplacian matrix as the basis for plotting the polynomials, we can observe the behavior and magnitude of the polynomials at different eigenvalues, providing insights into their spectral properties and frequency response characteristics.

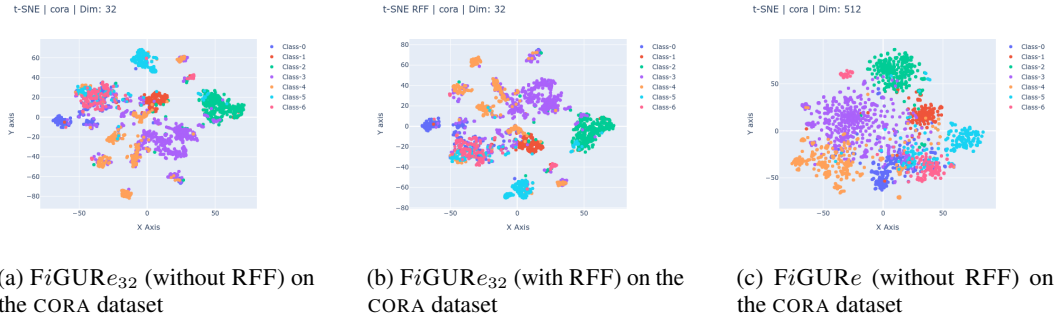

Figure 4: The figures present t-SNE plots for the CORA dataset. These plots showcase the embeddings generated by the  $F_3$  filter, which corresponds to  $A^2$  in the case of FiGURE. The t-SNE plots are generated at different embedding dimensions, providing insights into the distribution and clustering of the embeddings for each dataset.

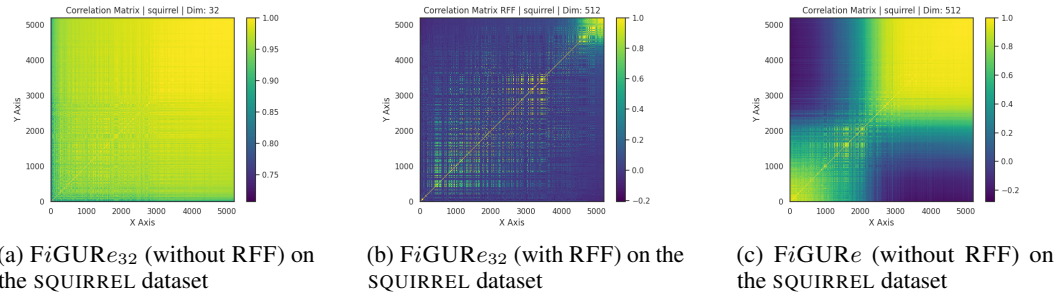

Figure 5: The figures display the normalized correlation plots for the SQUIRREL dataset. These plots illustrate the normalized correlation values between embeddings generated by the  $F_3$  filter. In the case of FiGURE, this filter corresponds to the square of the adjacency matrix ( $A^2$ ). The normalized correlation provides a measure of similarity or agreement between the embeddings obtained using the  $F_3$  filter for different embedding dimensions. These plots can help analyze the consistency or variation of embeddings across different dimensions and datasets.
